# Supplementary material
Source: PubMed Central journal article supplement (PMC2674334)
Supplement: NIHMS102706-supplement-supplement_1.pdf [file NIHMS102706-supplement-supplement_1.pdf]

## SUMMARY

1 The diagnosis and staging of lung cancer often begins with the assessment of a suspect periph-  
2 eral chest site. Such suspicious peripheral sites may be solitary pulmonary nodules, diffuse masses,  
3 or other abnormally appearing regions of interest (ROIs). The state-of-the-art process for assessing  
4 such peripheral ROIs involves off-line procedure planning using a three-dimensional (3D) multi-  
5 detector computed tomography (MDCT) chest scan followed by bronchoscopy with an ultrathin  
6 bronchoscope.  
7  
8  
9

10 The current practice for planning bronchoscopic procedures requires the physician to scroll  
11 through two-dimensional (2D) transverse-plane sections of the MDCT image on a computer console  
12 and perform 3D mental reconstruction of the anatomy. Unfortunately, mentally defining routes is  
13 an arduous, error-prone process. Even if an accurate route is defined through 3D MDCT analysis,  
14 the physician must navigate the bronchoscope — with no direct MDCT-based assistance — through  
15 the complex bifurcating airway tree to reach a site. These factors make bronchoscopy of peripheral  
16 sites difficult. Recent research has shown that virtual bronchoscopic guidance can enable physicians  
17 to reliably perform follow-on ultrathin bronchoscopic procedures. The current manual process  
18 for generating peripheral VB guidance data, however, is time-consuming and laborious for the  
19 physician.  
20  
21  
22  
23  
24  
25  
26  
27  
28

29 We present an integrated computer-based system for planning peripheral bronchoscopic proce-  
30 dures. The system takes a 3D MDCT chest image as input and requires seven processing steps: (1)  
31 ROI selection; (2) ROI Definition; (3) Airway-Tree Segmentation; (4) Airway Surface Definition;  
32 (5) Centerline Analysis; (6) Route Planning; and (7) Airway-Tree Editing. The system performs  
33 nearly all operations automatically, with the only interaction required by the physician being step  
34 (2), ROI Selection. The system is computationally efficient and fits smoothly within the clinical  
35 work flow. Integrated into the system and described in detail in the paper is new surface-definition  
36 method, which is vital for effective analysis and planning to peripheral sites.  
37  
38  
39  
40  
41  
42  
43

44 Results demonstrate the efficacy of the system, the impact of the new surface definition method,  
45 the system's applications to the subsequent live guidance of ultrathin bronchoscopy to the periphery.  
46 We have tested the system on over 40 human cases to date, with 14 cases having undergone full  
47 live guidance of bronchoscopy to the periphery. Results show that the system requires less than 15  
48 minutes to generate planning data.  
49  
50  
51  
52  
53  
54  
55  
56

1  
2  
3  
4  
5  
6  
7  
8  
9  
10  
11  
12  
13  
14  
15  
16  
17  
18  
19  
20  
21  
22  
23  
24  
25  
26  
27  
28  
29  
30  
31  
32  
33  
34  
35  
36  
37  
38  
39  
40  
41  
42  
43  
44  
45  
46  
47  
48  
49  
50  
51  
52  
53  
54  
55  
56  
57  
58  
59  
60  
61  
62  
63  
64  
65

```
This is pdfTeXk, Version 3.141592-1.40.3 (Web2C 7.5.6) (format=latex 2008.3.14) 15 DEC 2008
16:44
entering extended mode
%&-line parsing enabled.
**cbm2008gibbs_submitted.tex
(./cbm2008gibbs_submitted.tex
LaTeX2e <2005/12/01>
Babel <v3.8h> and hyphenation patterns for english, usenglishmax, dumylang, noh
ypphenation, arabic, basque, bulgarian, coptic, welsh, czech, slovak, german, ng
erman, danish, esperanto, spanish, catalan, galician, estonian, farsi, finnish,
french, greek, monogreek, ancientgreek, croatian, hungarian, interlingua, ibyc
us, indonesian, icelandic, italian, latin, mongolian, dutch, norsk, polish, por
tuguese, pinyin, romanian, russian, slovenian, uppsorbian, serbian, swedish,
turkish, ukenglish, ukrainian, loaded.
(c:/TeXLive2007/texmf-dist/tex/latex/base/article.cls
Document Class: article 2005/09/16 v1.4f Standard LaTeX document class
(c:/TeXLive2007/texmf-dist/tex/latex/base/size11.clo
File: size11.clo 2005/09/16 v1.4f Standard LaTeX file (size option)
)
\c@part=\count79
\c@section=\count80
\c@subsection=\count81
\c@subsubsection=\count82
\c@paragraph=\count83
\c@subparagraph=\count84
\c@figure=\count85
\c@table=\count86
\abovecaptionskip=\skip41
\belowcaptionskip=\skip42
\bibindent=\dimen102
) (./cite.sty
LaTeX Info: Redefining \cite on input line 149.
LaTeX Info: Redefining \nocite on input line 214.
Package: cite 2003/11/04 v 4.01
) (c:/TeXLive2007/texmf-dist/tex/latex/graphics/graphicx.sty
```

1  
2  
3 Package: graphicx 1999/02/16 v1.0f Enhanced LaTeX Graphics (DPC,SPQR)  
4 (c:/TeXLive2007/texmf-dist/tex/latex/graphics/keyval.sty  
5  
6 Package: keyval 1999/03/16 v1.13 key=value parser (DPC)  
7  
8 \KV@toks@=\toks14  
9  
10 ) (c:/TeXLive2007/texmf-dist/tex/latex/graphics/graphics.sty  
11 Package: graphics 2006/02/20 v1.0o Standard LaTeX Graphics (DPC,SPQR)  
12 (c:/TeXLive2007/texmf-dist/tex/latex/graphics/trig.sty  
13  
14 Package: trig 1999/03/16 v1.09 sin cos tan (DPC)  
15  
16 ) (c:/TeXLive2007/texmf/tex/latex/config/graphics.cfg  
17 File: graphics.cfg 2007/01/18 v1.5 graphics configuration of teTeX/TeXLive  
18  
19 )  
20 Package graphics Info: Driver file: dvips.def on input line 90.  
21 (c:/TeXLive2007/texmf-dist/tex/latex/graphics/dvips.def  
22 File: dvips.def 1999/02/16 v3.0i Driver-dependant file (DPC,SPQR)  
23  
24 ))  
25  
26 \Gin@req@height=\dimen103  
27  
28 \Gin@req@width=\dimen104  
29  
30 ) (c:/TeXLive2007/texmf-dist/tex/latex/amsmath/amsmath.sty  
31 Package: amsmath 2000/07/18 v2.13 AMS math features  
32  
33 \@mathmargin=\skip43  
34 For additional information on amsmath, use the '?' option.  
35 (c:/TeXLive2007/texmf-dist/tex/latex/amsmath/amstext.sty  
36  
37 Package: amstext 2000/06/29 v2.01  
38 (c:/TeXLive2007/texmf-dist/tex/latex/amsmath/amsgen.sty  
39 File: amsgen.sty 1999/11/30 v2.0  
40  
41 \@emptytoks=\toks15  
42  
43 \ex@=\dimen105  
44  
45 )) (c:/TeXLive2007/texmf-dist/tex/latex/amsmath/amsbsy.sty  
46  
47 Package: amsbsy 1999/11/29 v1.2d  
48  
49 \pmbraise@=\dimen106  
50  
51 ) (c:/TeXLive2007/texmf-dist/tex/latex/amsmath/amsopn.sty  
52 Package: amsopn 1999/12/14 v2.01 operator names  
53  
54 )  
55 \inf@bad=\count87  
56 LaTeX Info: Redefining \frac on input line 211.  
57  
58  
59  
60  
61  
62  
63  
64  
65

1  
2  
3  $\backslash\uproot@=\count88$   
4  $\backslash\leftroot@=\count89$   
5  
6 LaTeX Info: Redefining  $\overline$  on input line 307.  
7  
8  $\backslash\classnum@=\count90$   
9  $\backslash\DOTSCASE@=\count91$   
10 LaTeX Info: Redefining  $\ldots$  on input line 379.  
11 LaTeX Info: Redefining  $\dots$  on input line 382.  
12 LaTeX Info: Redefining  $\cdots$  on input line 467.  
13  
14  $\backslash\Mathstrutbox@=\box26$   
15  $\backslash\strutbox@=\box27$   
16  
17  $\backslash\big@size=\dimen107$   
18 LaTeX Font Info: Redeclaring font encoding OML on input line 567.  
19 LaTeX Font Info: Redeclaring font encoding OMS on input line 568.  
20  
21  $\backslash\macc@depth=\count92$   
22  $\backslash\c@MaxMatrixCols=\count93$   
23  $\backslash\dotsspace@=\muskip10$   
24  $\backslash\c@parentequation=\count94$   
25  $\backslash\dspbrk@|v|=\count95$   
26  $\backslash\tag@help=\toks16$   
27  $\backslash\row@=\count96$   
28  $\backslash\column@=\count97$   
29  $\backslash\maxfields@=\count98$   
30  $\backslash\andhelp@=\toks17$   
31  $\backslash\eqnshift@=\dimen108$   
32  $\backslash\alignsep@=\dimen109$   
33  $\backslash\tagshift@=\dimen110$   
34  $\backslash\tagwidth@=\dimen111$   
35  $\backslash\totwidth@=\dimen112$   
36  $\backslash\lineht@=\dimen113$   
37  $\backslash\@envbody=\toks18$   
38  $\backslash\multlinegap=\skip44$   
39  $\backslash\multlinetaggap=\skip45$   
40  $\backslash\mathdisplay@stack=\toks19$   
41 LaTeX Info: Redefining  $\lbrack$  on input line 2666.  
42 LaTeX Info: Redefining  $\rbrack$  on input line 2667.  
43  
44  
45  
46  
47  
48  
49  
50  
51  
52  
53  
54  
55  
56  
57  
58  
59  
60  
61  
62  
63  
64  
65

1  
2  
3  
4  
5  
6  
7  
8  
9  
10  
11  
12  
13  
14  
15  
16  
17  
18  
19  
20  
21  
22  
23  
24  
25  
26  
27  
28  
29  
30  
31  
32  
33  
34  
35  
36  
37  
38  
39  
40  
41  
42  
43  
44  
45  
46  
47  
48  
49  
50  
51  
52  
53  
54  
55  
56  
57  
58  
59  
60  
61  
62  
63  
64  
65

```
) (c:/TeXLive2007/texmf-dist/tex/latex/amssymb/amssymb.sty
Package: amssymb 2002/01/22 v2.2d
(c:/TeXLive2007/texmf-dist/tex/latex/amssymb/amssymb.sty
Package: amssymb 2002/01/22 v2.2d
\symAMSa=\mathgroup4
\symAMSb=\mathgroup5
LaTeX Font Info: Overwriting math alphabet '\mathfrak' in version 'bold'
(Font) U/euf/m/n --> U/euf/b/n on input line 132.
)) (c:/TeXLive2007/texmf-dist/tex/latex/multirow/multirow.sty
\bigstrutjot=\dimen114
)
```

LaTeX Warning: Unused global option(s):  
[epsfig].

```
(./cbm2008gibbs_submitted.aux)
\openout1 = `cbm2008gibbs_submitted.aux'.
```

```
LaTeX Font Info: Checking defaults for OML/cmm/m/it on input line 25.
LaTeX Font Info: ... okay on input line 25.
LaTeX Font Info: Checking defaults for T1/cmr/m/n on input line 25.
LaTeX Font Info: ... okay on input line 25.
LaTeX Font Info: Checking defaults for OT1/cmr/m/n on input line 25.
LaTeX Font Info: ... okay on input line 25.
LaTeX Font Info: Checking defaults for OMS/cmsy/m/n on input line 25.
LaTeX Font Info: ... okay on input line 25.
LaTeX Font Info: Checking defaults for OMX/cmex/m/n on input line 25.
LaTeX Font Info: ... okay on input line 25.
LaTeX Font Info: Checking defaults for U/cmr/m/n on input line 25.
LaTeX Font Info: ... okay on input line 25.
LaTeX Font Info: Try loading font information for U+msa on input line 35.
(c:/TeXLive2007/texmf-dist/tex/latex/amssymb/umsa.fd
File: umsa.fd 2002/01/19 v2.2g AMS font definitions
)
LaTeX Font Info: Try loading font information for U+msb on input line 35.
```

1  
2  
3  
4  
5  
6  
7  
8  
9  
10  
11  
12  
13  
14  
15  
16  
17  
18  
19  
20  
21  
22  
23  
24  
25  
26  
27  
28  
29  
30  
31  
32  
33  
34  
35  
36  
37  
38  
39  
40  
41  
42  
43  
44  
45  
46  
47  
48  
49  
50  
51  
52  
53  
54  
55  
56  
57  
58  
59  
60  
61  
62  
63  
64  
65

(c:/TeXLive2007/texmf-dist/tex/latex/amsfonts/umsb.fd

File: umsb.fd 2002/01/19 v2.2g AMS font definitions

) (./p1intro.tex [1

] [2]) (./p2methods.tex

Underfull \hbox (badness 10000) in paragraph at lines 13--22

□

[3]

Underfull \hbox (badness 10000) in paragraph at lines 47--58

□

[4] [5] [6] [7] [8] [9] [10] [11] [12] [13]) (./p3results.tex [14] [15]) (./p4c

onclude.tex [16]) (./cbm2008gibbs\_submitted.bbl [17] [18] [19]) (./p5figures.te

x [20]

LaTeX Warning: File `figures/Fig1MentAnal\_gray.ps' not found on input line 49.

! LaTeX Error: File `figures/Fig1MentAnal\_gray.ps' not found.

See the LaTeX manual or LaTeX Companion for explanation.

Type H <return> for immediate help.

...

l.49 ...s[scale=0.9]{figures/Fig1MentAnal\_gray.ps}

Try typing <return> to proceed.

If that doesn't work, type X <return> to quit.

! LaTeX Error: Cannot determine size of graphic in figures/Fig1MentAnal\_gray.ps  
(no BoundingBox).

1  
2  
3  
4  
5  
6  
7  
8  
9  
10  
11  
12  
13  
14  
15  
16  
17  
18  
19  
20  
21  
22  
23  
24  
25  
26  
27  
28  
29  
30  
31  
32  
33  
34  
35  
36  
37  
38  
39  
40  
41  
42  
43  
44  
45  
46  
47  
48  
49  
50  
51  
52  
53  
54  
55  
56  
57  
58  
59  
60  
61  
62  
63  
64  
65

See the LaTeX manual or LaTeX Companion for explanation.

Type H <return> for immediate help.

...

l.49 ...s[scale=0.9]{figures/Fig1MentAnal\_gray.ps}

Try typing <return> to proceed.

If that doesn't work, type X <return> to quit.

File: figures/Fig1MentAnal\_gray.ps Graphic file (type eps)

<figures/Fig1MentAnal\_gray.ps>

LaTeX Warning: `h' float specifier changed to `ht'.

[21] [22]

LaTeX Warning: File `figures/Fig2a20349\_25\_lw\_big\_slice.ps' not found on input line 71.

! LaTeX Error: File `figures/Fig2a20349\_25\_lw\_big\_slice.ps' not found.

See the LaTeX manual or LaTeX Companion for explanation.

Type H <return> for immediate help.

...

l.71 ...mm}{figures/Fig2a20349\_25\_lw\_big\_slice.ps}

& \includegraphics[height=...

Try typing <return> to proceed.

If that doesn't work, type X <return> to quit.

! LaTeX Error: Cannot determine size of graphic in figures/Fig2a20349\_25\_lw\_big

1  
2  
3 \_slice.ps (no BoundingBox).  
4  
5

6 See the LaTeX manual or LaTeX Companion for explanation.

7 Type H <return> for immediate help.

8  
9 ...  
10

11  
12 l.71 ...mm}{figures/Fig2a20349\_25\_lw\_big\_slice.ps}

13  
14 & \includegraphics[height=...  
15  
16

17 Try typing <return> to proceed.

18 If that doesn't work, type X <return> to quit.  
19  
20

21  
22 File: figures/Fig2a20349\_25\_lw\_big\_slice.ps Graphic file (type eps)

23 <figures/Fig2a20349\_25\_lw\_big\_slice.ps>  
24  
25

26 LaTeX Warning: File `figures/Fig2b20349\_25\_Seg\_Global.ps' not found on input li  
27 ne 71.  
28  
29

30  
31  
32  
33 ! LaTeX Error: File `figures/Fig2b20349\_25\_Seg\_Global.ps' not found.  
34  
35

36 See the LaTeX manual or LaTeX Companion for explanation.

37 Type H <return> for immediate help.

38  
39 ...  
40  
41

42 l.71 ...53mm}{figures/Fig2b20349\_25\_Seg\_Global.ps}

43  
44 \\  
45

46 Try typing <return> to proceed.

47 If that doesn't work, type X <return> to quit.  
48  
49  
50

51  
52 ! LaTeX Error: Cannot determine size of graphic in figures/Fig2b20349\_25\_Seg\_Gl  
53 obal.ps (no BoundingBox).  
54  
55

56 See the LaTeX manual or LaTeX Companion for explanation.  
57  
58  
59  
60  
61  
62  
63  
64  
65

1  
2  
3  
4  
5  
6  
7  
8  
9  
10  
11  
12  
13  
14  
15  
16  
17  
18  
19  
20  
21  
22  
23  
24  
25  
26  
27  
28  
29  
30  
31  
32  
33  
34  
35  
36  
37  
38  
39  
40  
41  
42  
43  
44  
45  
46  
47  
48  
49  
50  
51  
52  
53  
54  
55  
56  
57  
58  
59  
60  
61  
62  
63  
64  
65

Type H <return> for immediate help.

...

l.71 ...53mm}{figures/Fig2b20349\_25\_Seg\_Global.ps}

\\

Try typing <return> to proceed.

If that doesn't work, type X <return> to quit.

File: figures/Fig2b20349\_25\_Seg\_Global.ps Graphic file (type eps)

<figures/Fig2b20349\_25\_Seg\_Global.ps>

LaTeX Warning: File `figures/Fig2c20349\_25\_Centerlines.ps' not found on input line 73.

! LaTeX Error: File `figures/Fig2c20349\_25\_Centerlines.ps' not found.

See the LaTeX manual or LaTeX Companion for explanation.

Type H <return> for immediate help.

...

l.73 ...3mm}{figures/Fig2c20349\_25\_Centerlines.ps}

&

Try typing <return> to proceed.

If that doesn't work, type X <return> to quit.

! LaTeX Error: Cannot determine size of graphic in figures/Fig2c20349\_25\_Centerlines.ps (no BoundingBox).

See the LaTeX manual or LaTeX Companion for explanation.

Type H <return> for immediate help.

...

l.73 ...3mm}{figures/Fig2c20349\_25\_Centerlines.ps}

1  
2  
3  
4  
5  
6  
7  
8  
9  
10  
11  
12  
13  
14  
15  
16  
17  
18  
19  
20  
21  
22  
23  
24  
25  
26  
27  
28  
29  
30  
31  
32  
33  
34  
35  
36  
37  
38  
39  
40  
41  
42  
43  
44  
45  
46  
47  
48  
49  
50  
51  
52  
53  
54  
55  
56  
57  
58  
59  
60  
61  
62  
63  
64  
65

&

Try typing <return> to proceed.  
If that doesn't work, type X <return> to quit.

File: figures/Fig2c20349\_25\_Centerlines.ps Graphic file (type eps)  
<figures/Fig2c20349\_25\_Centerlines.ps>

LaTeX Warning: File `figures/Fig2d20349\_25\_Centerlines\_and\_Route.ps' not found  
on input line 74.

! LaTeX Error: File `figures/Fig2d20349\_25\_Centerlines\_and\_Route.ps' not found.

See the LaTeX manual or LaTeX Companion for explanation.  
Type H <return> for immediate help.  
...

l.74 ...es/Fig2d20349\_25\_Centerlines\_and\_Route.ps}

\\

Try typing <return> to proceed.  
If that doesn't work, type X <return> to quit.

! LaTeX Error: Cannot determine size of graphic in figures/Fig2d20349\_25\_Center  
lines\_and\_Route.ps (no BoundingBox).

See the LaTeX manual or LaTeX Companion for explanation.  
Type H <return> for immediate help.  
...

l.74 ...es/Fig2d20349\_25\_Centerlines\_and\_Route.ps}

\\

Try typing <return> to proceed.  
If that doesn't work, type X <return> to quit.

1  
2  
3  
4  
5 File: figures/Fig2d20349\_25\_Centerlines\_and\_Route.ps Graphic file (type eps)  
6 <figures/Fig2d20349\_25\_Centerlines\_and\_Route.ps>

7  
8  
9  
10 LaTeX Warning: File `figures/Fig2e20349\_25\_oblique.ps' not found on input line  
11 76.

12  
13  
14  
15  
16 ! LaTeX Error: File `figures/Fig2e20349\_25\_oblique.ps' not found.

17  
18  
19 See the LaTeX manual or LaTeX Companion for explanation.  
20 Type H <return> for immediate help.

21  
22 ...

23  
24  
25 l.76 ...ht=53mm]{figures/Fig2e20349\_25\_oblique.ps}

26  
27 &

28 Try typing <return> to proceed.  
29 If that doesn't work, type X <return> to quit.

30  
31  
32  
33  
34 ! LaTeX Error: Cannot determine size of graphic in figures/Fig2e20349\_25\_obliqu  
35 e.ps (no BoundingBox).

36  
37  
38  
39 See the LaTeX manual or LaTeX Companion for explanation.  
40 Type H <return> for immediate help.

41  
42 ...

43  
44  
45 l.76 ...ht=53mm]{figures/Fig2e20349\_25\_oblique.ps}

46  
47 &

48 Try typing <return> to proceed.  
49 If that doesn't work, type X <return> to quit.

50  
51  
52  
53 File: figures/Fig2e20349\_25\_oblique.ps Graphic file (type eps)  
54 <figures/Fig2e20349\_25\_oblique.ps>

55  
56  
57  
58  
59  
60  
61  
62  
63  
64  
65

1  
2  
3  
4  
5  
6  
7  
8  
9  
10  
11  
12  
13  
14  
15  
16  
17  
18  
19  
20  
21  
22  
23  
24  
25  
26  
27  
28  
29  
30  
31  
32  
33  
34  
35  
36  
37  
38  
39  
40  
41  
42  
43  
44  
45  
46  
47  
48  
49  
50  
51  
52  
53  
54  
55  
56  
57  
58  
59  
60  
61  
62  
63  
64  
65

LaTeX Warning: File `figures/Fig2e20349\_25\_added\_branch\_arrow.ps' not found on input line 77.

! LaTeX Error: File `figures/Fig2e20349\_25\_added\_branch\_arrow.ps' not found.

See the LaTeX manual or LaTeX Companion for explanation.

Type H <return> for immediate help.

...

l.77 ...gures/Fig2e20349\_25\_added\_branch\_arrow.ps}

\\

Try typing <return> to proceed.

If that doesn't work, type X <return> to quit.

! LaTeX Error: Cannot determine size of graphic in figures/Fig2e20349\_25\_added\_branch\_arrow.ps (no BoundingBox).

See the LaTeX manual or LaTeX Companion for explanation.

Type H <return> for immediate help.

...

l.77 ...gures/Fig2e20349\_25\_added\_branch\_arrow.ps}

\\

Try typing <return> to proceed.

If that doesn't work, type X <return> to quit.

File: figures/Fig2e20349\_25\_added\_branch\_arrow.ps Graphic file (type eps)

<figures/Fig2e20349\_25\_added\_branch\_arrow.ps>

LaTeX Warning: Float too large for page by 0.14223pt on input line 92.

LaTeX Warning: File `figures/Fig3a20349\_3\_24\_bif12\_before.ps' not found on input line 92.

1  
2  
3 t line 97.  
4  
5  
6

7  
8 ! LaTeX Error: File `figures/Fig3a20349\_3\_24\_bif12\_before.ps' not found.  
9

10 See the LaTeX manual or LaTeX Companion for explanation.

11 Type H <return> for immediate help.

12 ...  
13

14  
15  
16  
17 l.97 ...]{figures/Fig3a20349\_3\_24\_bif12\_before.ps}

18 &  
19

20 Try typing <return> to proceed.

21 If that doesn't work, type X <return> to quit.  
22  
23  
24  
25

26  
27 ! LaTeX Error: Cannot determine size of graphic in figures/Fig3a20349\_3\_24\_bif1  
28 2\_before.ps (no BoundingBox).  
29  
30

31 See the LaTeX manual or LaTeX Companion for explanation.

32 Type H <return> for immediate help.

33 ...  
34  
35  
36  
37

38 l.97 ...]{figures/Fig3a20349\_3\_24\_bif12\_before.ps}

39 &  
40

41 Try typing <return> to proceed.

42 If that doesn't work, type X <return> to quit.  
43  
44

45 File: figures/Fig3a20349\_3\_24\_bif12\_before.ps Graphic file (type eps)

46 <figures/Fig3a20349\_3\_24\_bif12\_before.ps>  
47  
48  
49

50 LaTeX Warning: File `figures/Fig3b20349\_3\_24\_bif12\_after.ps' not found on input  
51 line 98.  
52  
53  
54  
55

56 ! LaTeX Error: File `figures/Fig3b20349\_3\_24\_bif12\_after.ps' not found.  
57  
58  
59  
60  
61  
62  
63  
64  
65

1  
2  
3  
4  
5  
6  
7  
8  
9  
10  
11  
12  
13  
14  
15  
16  
17  
18  
19  
20  
21  
22  
23  
24  
25  
26  
27  
28  
29  
30  
31  
32  
33  
34  
35  
36  
37  
38  
39  
40  
41  
42  
43  
44  
45  
46  
47  
48  
49  
50  
51  
52  
53  
54  
55  
56  
57  
58  
59  
60  
61  
62  
63  
64  
65

See the LaTeX manual or LaTeX Companion for explanation.

Type H <return> for immediate help.

...

l.98 ...6}{figures/Fig3b20349\_3\_24\_bif12\_after.ps}

&

Try typing <return> to proceed.

If that doesn't work, type X <return> to quit.

! LaTeX Error: Cannot determine size of graphic in figures/Fig3b20349\_3\_24\_bif12\_after.ps (no BoundingBox).

See the LaTeX manual or LaTeX Companion for explanation.

Type H <return> for immediate help.

...

l.98 ...6}{figures/Fig3b20349\_3\_24\_bif12\_after.ps}

&

Try typing <return> to proceed.

If that doesn't work, type X <return> to quit.

File: figures/Fig3b20349\_3\_24\_bif12\_after.ps Graphic file (type eps)

<figures/Fig3b20349\_3\_24\_bif12\_after.ps>

LaTeX Warning: File `figures/Fig3c20349\_3\_24\_bif12\_video.ps' not found on input line 99.

! LaTeX Error: File `figures/Fig3c20349\_3\_24\_bif12\_video.ps' not found.

See the LaTeX manual or LaTeX Companion for explanation.

Type H <return> for immediate help.

...

1  
2  
3  
4  
5 I.99 ...6]{figures/Fig3c20349\_3\_24\_bif12\_video.ps}

6  
7 \\

8 Try typing <return> to proceed.

9 If that doesn't work, type X <return> to quit.

10  
11  
12  
13  
14 ! LaTeX Error: Cannot determine size of graphic in figures/Fig3c20349\_3\_24\_bif1  
15 2\_video.ps (no BoundingBox).

16  
17  
18 See the LaTeX manual or LaTeX Companion for explanation.

19 Type H <return> for immediate help.

20  
21 ...

22  
23  
24  
25 I.99 ...6]{figures/Fig3c20349\_3\_24\_bif12\_video.ps}

26  
27 \\

28 Try typing <return> to proceed.

29 If that doesn't work, type X <return> to quit.

30  
31  
32 File: figures/Fig3c20349\_3\_24\_bif12\_video.ps Graphic file (type eps)

33 <figures/Fig3c20349\_3\_24\_bif12\_video.ps>

34  
35  
36  
37 LaTeX Warning: File `figures/Fig4athick\_wall\_plot\_BW.ps' not found on input lin  
38 e 117.

39  
40  
41  
42  
43 ! LaTeX Error: File `figures/Fig4athick\_wall\_plot\_BW.ps' not found.

44  
45 See the LaTeX manual or LaTeX Companion for explanation.

46 Type H <return> for immediate help.

47  
48 ...

49  
50  
51 I.117 ...25mm]{figures/Fig4athick\_wall\_plot\_BW.ps}

52  
53 & \includegraphics[height=...

54  
55  
56  
57  
58  
59  
60  
61  
62  
63  
64  
65

1  
2  
3  
4  
5  
6  
7  
8  
9  
10  
11  
12  
13  
14  
15  
16  
17  
18  
19  
20  
21  
22  
23  
24  
25  
26  
27  
28  
29  
30  
31  
32  
33  
34  
35  
36  
37  
38  
39  
40  
41  
42  
43  
44  
45  
46  
47  
48  
49  
50  
51  
52  
53  
54  
55  
56  
57  
58  
59  
60  
61  
62  
63  
64  
65

Try typing <return> to proceed.  
If that doesn't work, type X <return> to quit.

! LaTeX Error: Cannot determine size of graphic in figures/Fig4athick\_wall\_plot\_BW.ps (no BoundingBox).

See the LaTeX manual or LaTeX Companion for explanation.  
Type H <return> for immediate help.  
...

```
l.117 ...25mm]{figures/Fig4athick_wall_plot_BW.ps}
           & \includegraphics[height=...
```

Try typing <return> to proceed.  
If that doesn't work, type X <return> to quit.

File: figures/Fig4athick\_wall\_plot\_BW.ps Graphic file (type eps)  
<figures/Fig4athick\_wall\_plot\_BW.ps>

LaTeX Warning: File `figures/Fig4bthin\_wall\_plot\_BW.ps' not found on input line 117.

! LaTeX Error: File `figures/Fig4bthin\_wall\_plot\_BW.ps' not found.

See the LaTeX manual or LaTeX Companion for explanation.  
Type H <return> for immediate help.  
...

```
l.117 ...=25mm]{figures/Fig4bthin_wall_plot_BW.ps}
           \\
```

Try typing <return> to proceed.  
If that doesn't work, type X <return> to quit.

1  
2  
3  
4  
5 ! LaTeX Error: Cannot determine size of graphic in figures/Fig4bthin\_wall\_plot\_  
6 BW.ps (no BoundingBox).

7  
8  
9 See the LaTeX manual or LaTeX Companion for explanation.

10 Type H <return> for immediate help.

11 ...

12  
13  
14  
15  
16 l.117 ...=25mm]{figures/Fig4bthin\_wall\_plot\_BW.ps}

17 \\

18 Try typing <return> to proceed.

19 If that doesn't work, type X <return> to quit.

20  
21  
22  
23 File: figures/Fig4bthin\_wall\_plot\_BW.ps Graphic file (type eps)

24 <figures/Fig4bthin\_wall\_plot\_BW.ps>

25  
26  
27  
28 LaTeX Warning: File `figures/Fig5a20349\_26\_cross\_sect\_NOHU.ps' not found on inp  
29 ut line 139.

30  
31  
32  
33  
34 ! LaTeX Error: File `figures/Fig5a20349\_26\_cross\_sect\_NOHU.ps' not found.

35  
36  
37 See the LaTeX manual or LaTeX Companion for explanation.

38 Type H <return> for immediate help.

39 ...

40  
41  
42  
43  
44 l.139 ...figures/Fig5a20349\_26\_cross\_sect\_NOHU.ps}

45 &

46 Try typing <return> to proceed.

47 If that doesn't work, type X <return> to quit.

48  
49  
50  
51  
52  
53 ! LaTeX Error: Cannot determine size of graphic in figures/Fig5a20349\_26\_cross\_  
54 sect\_NOHU.ps (no BoundingBox).

1  
2  
3  
4  
5  
6  
7  
8  
9  
10  
11  
12  
13  
14  
15  
16  
17  
18  
19  
20  
21  
22  
23  
24  
25  
26  
27  
28  
29  
30  
31  
32  
33  
34  
35  
36  
37  
38  
39  
40  
41  
42  
43  
44  
45  
46  
47  
48  
49  
50  
51  
52  
53  
54  
55  
56  
57  
58  
59  
60  
61  
62  
63  
64  
65

See the LaTeX manual or LaTeX Companion for explanation.

Type H <return> for immediate help.

...

l.139 ...figures/Fig5a20349\_26\_cross\_sect\_NOHU.ps}

&

Try typing <return> to proceed.

If that doesn't work, type X <return> to quit.

File: figures/Fig5a20349\_26\_cross\_sect\_NOHU.ps Graphic file (type eps)

<figures/Fig5a20349\_26\_cross\_sect\_NOHU.ps>

LaTeX Warning: File `figures/Fig5a20349\_29\_Scope\_View.ps' not found on input line 140.

! LaTeX Error: File `figures/Fig5a20349\_29\_Scope\_View.ps' not found.

See the LaTeX manual or LaTeX Companion for explanation.

Type H <return> for immediate help.

...

l.140 ...7mm}{figures/Fig5a20349\_29\_Scope\_View.ps}

&

Try typing <return> to proceed.

If that doesn't work, type X <return> to quit.

! LaTeX Error: Cannot determine size of graphic in figures/Fig5a20349\_29\_Scope\_View.ps (no BoundingBox).

See the LaTeX manual or LaTeX Companion for explanation.

Type H <return> for immediate help.

...

1  
2  
3  
4  
5  
6  
7  
8  
9  
10  
11  
12  
13  
14  
15  
16  
17  
18  
19  
20  
21  
22  
23  
24  
25  
26  
27  
28  
29  
30  
31  
32  
33  
34  
35  
36  
37  
38  
39  
40  
41  
42  
43  
44  
45  
46  
47  
48  
49  
50  
51  
52  
53  
54  
55  
56  
57  
58  
59  
60  
61  
62  
63  
64  
65

l.140 ...7mm}{figures/Fig5a20349\_29\_Scope\_View.ps}

&

Try typing <return> to proceed.

If that doesn't work, type X <return> to quit.

File: figures/Fig5a20349\_29\_Scope\_View.ps Graphic file (type eps)

<figures/Fig5a20349\_29\_Scope\_View.ps>

LaTeX Warning: File `figures/Fig5b20349\_26\_cross\_sect\_new.ps' not found on input line 141.

! LaTeX Error: File `figures/Fig5b20349\_26\_cross\_sect\_new.ps' not found.

See the LaTeX manual or LaTeX Companion for explanation.

Type H <return> for immediate help.

...

l.141 ...{figures/Fig5b20349\_26\_cross\_sect\_new.ps}

&

Try typing <return> to proceed.

If that doesn't work, type X <return> to quit.

! LaTeX Error: Cannot determine size of graphic in figures/Fig5b20349\_26\_cross\_sect\_new.ps (no BoundingBox).

See the LaTeX manual or LaTeX Companion for explanation.

Type H <return> for immediate help.

...

l.141 ...{figures/Fig5b20349\_26\_cross\_sect\_new.ps}

&

Try typing <return> to proceed.

If that doesn't work, type X <return> to quit.

1  
2  
3  
4  
5  
6  
7  
8  
9  
10  
11  
12  
13  
14  
15  
16  
17  
18  
19  
20  
21  
22  
23  
24  
25  
26  
27  
28  
29  
30  
31  
32  
33  
34  
35  
36  
37  
38  
39  
40  
41  
42  
43  
44  
45  
46  
47  
48  
49  
50  
51  
52  
53  
54  
55  
56  
57  
58  
59  
60  
61  
62  
63  
64  
65

File: figures/Fig5b20349\_26\_cross\_sect\_new.ps Graphic file (type eps)  
<figures/Fig5b20349\_26\_cross\_sect\_new.ps>

LaTeX Warning: File `figures/Fig5b20349\_26\_endo\_new\_method.ps' not found on input line 142.

! LaTeX Error: File `figures/Fig5b20349\_26\_endo\_new\_method.ps' not found.

See the LaTeX manual or LaTeX Companion for explanation.

Type H <return> for immediate help.

...

l.142 ...figures/Fig5b20349\_26\_endo\_new\_method.ps}

\\

Try typing <return> to proceed.

If that doesn't work, type X <return> to quit.

! LaTeX Error: Cannot determine size of graphic in figures/Fig5b20349\_26\_endo\_new\_method.ps (no BoundingBox).

See the LaTeX manual or LaTeX Companion for explanation.

Type H <return> for immediate help.

...

l.142 ...figures/Fig5b20349\_26\_endo\_new\_method.ps}

\\

Try typing <return> to proceed.

If that doesn't work, type X <return> to quit.

File: figures/Fig5b20349\_26\_endo\_new\_method.ps Graphic file (type eps)  
<figures/Fig5b20349\_26\_endo\_new\_method.ps>

1  
2  
3 LaTeX Warning: File `figures/Fig5c20349\_26\_cross\_sect\_850HU.ps' not found on in  
4 put line 144.  
5  
6  
7  
8

9 ! LaTeX Error: File `figures/Fig5c20349\_26\_cross\_sect\_850HU.ps' not found.  
10  
11

12 See the LaTeX manual or LaTeX Companion for explanation.  
13

14 Type H <return> for immediate help.  
15

16 ...  
17

18  
19 l.144 ...igures/Fig5c20349\_26\_cross\_sect\_850HU.ps}  
20

21 &  
22

23 Try typing <return> to proceed.  
24

25 If that doesn't work, type X <return> to quit.  
26  
27

28 ! LaTeX Error: Cannot determine size of graphic in figures/Fig5c20349\_26\_cross\_  
29 sect\_850HU.ps (no BoundingBox).  
30  
31

32 See the LaTeX manual or LaTeX Companion for explanation.  
33

34 Type H <return> for immediate help.  
35

36 ...  
37  
38

39 l.144 ...igures/Fig5c20349\_26\_cross\_sect\_850HU.ps}  
40

41 &  
42

43 Try typing <return> to proceed.  
44

45 If that doesn't work, type X <return> to quit.  
46  
47

48 File: figures/Fig5c20349\_26\_cross\_sect\_850HU.ps Graphic file (type eps)  
49

50 <figures/Fig5c20349\_26\_cross\_sect\_850HU.ps>  
51

52 LaTeX Warning: File `figures/Fig5c20349\_26\_endo\_850.ps' not found on input line  
53 145.  
54  
55  
56  
57  
58  
59  
60  
61  
62  
63  
64  
65

1  
2  
3 ! LaTeX Error: File `figures/Fig5c20349\_26\_endo\_850.ps' not found.  
4  
5

6 See the LaTeX manual or LaTeX Companion for explanation.

7 Type H <return> for immediate help.

8  
9 ...  
10

11  
12 l.145 ...=37mm}{figures/Fig5c20349\_26\_endo\_850.ps}

13  
14 &

15 Try typing <return> to proceed.

16 If that doesn't work, type X <return> to quit.  
17  
18  
19  
20  
21

22 ! LaTeX Error: Cannot determine size of graphic in figures/Fig5c20349\_26\_endo\_8  
23 50.ps (no BoundingBox).  
24  
25

26 See the LaTeX manual or LaTeX Companion for explanation.

27 Type H <return> for immediate help.

28  
29 ...  
30  
31

32  
33 l.145 ...=37mm}{figures/Fig5c20349\_26\_endo\_850.ps}

34  
35 &

36 Try typing <return> to proceed.

37 If that doesn't work, type X <return> to quit.  
38  
39  
40

41 File: figures/Fig5c20349\_26\_endo\_850.ps Graphic file (type eps)

42 <figures/Fig5c20349\_26\_endo\_850.ps>  
43  
44

45 LaTeX Warning: File `figures/Fig5d20349\_26\_cross\_sect\_750HU.ps' not found on in  
46 put line 146.  
47  
48  
49  
50

51  
52 ! LaTeX Error: File `figures/Fig5d20349\_26\_cross\_sect\_750HU.ps' not found.  
53  
54

55 See the LaTeX manual or LaTeX Companion for explanation.

56 Type H <return> for immediate help.  
57  
58  
59  
60  
61  
62  
63  
64  
65

1  
2  
3  
4  
5  
6  
7  
8  
9  
10  
11  
12  
13  
14  
15  
16  
17  
18  
19  
20  
21  
22  
23  
24  
25  
26  
27  
28  
29  
30  
31  
32  
33  
34  
35  
36  
37  
38  
39  
40  
41  
42  
43  
44  
45  
46  
47  
48  
49  
50  
51  
52  
53  
54  
55  
56  
57  
58  
59  
60  
61  
62  
63  
64  
65

...

l.146 ...igures/Fig5d20349\_26\_cross\_sect\_750HU.ps}

&

Try typing <return> to proceed.  
If that doesn't work, type X <return> to quit.

! LaTeX Error: Cannot determine size of graphic in figures/Fig5d20349\_26\_cross\_sect\_750HU.ps (no BoundingBox).

See the LaTeX manual or LaTeX Companion for explanation.  
Type H <return> for immediate help.

...

l.146 ...igures/Fig5d20349\_26\_cross\_sect\_750HU.ps}

&

Try typing <return> to proceed.  
If that doesn't work, type X <return> to quit.

File: figures/Fig5d20349\_26\_cross\_sect\_750HU.ps Graphic file (type eps)  
<figures/Fig5d20349\_26\_cross\_sect\_750HU.ps>

LaTeX Warning: File `figures/Fig5d20349\_26\_endo\_750.ps' not found on input line 147.

! LaTeX Error: File `figures/Fig5d20349\_26\_endo\_750.ps' not found.

See the LaTeX manual or LaTeX Companion for explanation.  
Type H <return> for immediate help.

...

l.147 ...=37mm}{figures/Fig5d20349\_26\_endo\_750.ps}

\



1  
2  
3 ! LaTeX Error: Cannot determine size of graphic in figures/Fig5e20349\_26\_cross\_  
4 sect\_650HU.ps (no BoundingBox).  
5

6  
7  
8 See the LaTeX manual or LaTeX Companion for explanation.

9 Type H <return> for immediate help.

10 ...  
11

12  
13  
14 l.149 ...igures/Fig5e20349\_26\_cross\_sect\_650HU.ps}

15 &

16  
17 Try typing <return> to proceed.

18  
19 If that doesn't work, type X <return> to quit.  
20

21  
22 File: figures/Fig5e20349\_26\_cross\_sect\_650HU.ps Graphic file (type eps)

23 <figures/Fig5e20349\_26\_cross\_sect\_650HU.ps>  
24

25  
26 LaTeX Warning: File `figures/Fig5e20349\_26\_endo\_650.ps' not found on input line  
27 150.  
28

29  
30  
31  
32  
33 ! LaTeX Error: File `figures/Fig5e20349\_26\_endo\_650.ps' not found.  
34

35  
36 See the LaTeX manual or LaTeX Companion for explanation.

37 Type H <return> for immediate help.

38 ...  
39

40  
41  
42 l.150 ...=37mm}{figures/Fig5e20349\_26\_endo\_650.ps}

43 &

44  
45 Try typing <return> to proceed.

46  
47 If that doesn't work, type X <return> to quit.  
48

49  
50  
51  
52 ! LaTeX Error: Cannot determine size of graphic in figures/Fig5e20349\_26\_endo\_6  
53 50.ps (no BoundingBox).  
54

55  
56 See the LaTeX manual or LaTeX Companion for explanation.  
57  
58  
59  
60  
61  
62  
63  
64  
65

1  
2  
3  
4  
5  
6  
7  
8  
9  
10  
11  
12  
13  
14  
15  
16  
17  
18  
19  
20  
21  
22  
23  
24  
25  
26  
27  
28  
29  
30  
31  
32  
33  
34  
35  
36  
37  
38  
39  
40  
41  
42  
43  
44  
45  
46  
47  
48  
49  
50  
51  
52  
53  
54  
55  
56  
57  
58  
59  
60  
61  
62  
63  
64  
65

Type H <return> for immediate help.

...

l.150 ...=37mm}{figures/Fig5e20349\_26\_endo\_650.ps}

&

Try typing <return> to proceed.

If that doesn't work, type X <return> to quit.

File: figures/Fig5e20349\_26\_endo\_650.ps Graphic file (type eps)

<figures/Fig5e20349\_26\_endo\_650.ps>

LaTeX Warning: File `figures/Fig5f20349\_26\_cross\_sect\_600HU.ps' not found on input line 151.

! LaTeX Error: File `figures/Fig5f20349\_26\_cross\_sect\_600HU.ps' not found.

See the LaTeX manual or LaTeX Companion for explanation.

Type H <return> for immediate help.

...

l.151 ...igures/Fig5f20349\_26\_cross\_sect\_600HU.ps}

&

Try typing <return> to proceed.

If that doesn't work, type X <return> to quit.

! LaTeX Error: Cannot determine size of graphic in figures/Fig5f20349\_26\_cross\_sect\_600HU.ps (no BoundingBox).

See the LaTeX manual or LaTeX Companion for explanation.

Type H <return> for immediate help.

...

l.151 ...igures/Fig5f20349\_26\_cross\_sect\_600HU.ps}

1  
2  
3 &

4 Try typing <return> to proceed.

5  
6 If that doesn't work, type X <return> to quit.

7  
8  
9 File: figures/Fig5f20349\_26\_cross\_sect\_600HU.ps Graphic file (type eps)  
10 <figures/Fig5f20349\_26\_cross\_sect\_600HU.ps>

11  
12  
13  
14 LaTeX Warning: File `figures/Fig5f20349\_26\_endo\_600.ps' not found on input line  
15 152.

16  
17  
18  
19  
20 ! LaTeX Error: File `figures/Fig5f20349\_26\_endo\_600.ps' not found.

21  
22  
23 See the LaTeX manual or LaTeX Companion for explanation.

24 Type H <return> for immediate help.

25  
26 ...

27  
28  
29 l.152 ...=37mm]{figures/Fig5f20349\_26\_endo\_600.ps}

30  
31 \\

32 Try typing <return> to proceed.

33  
34 If that doesn't work, type X <return> to quit.

35  
36  
37  
38  
39 ! LaTeX Error: Cannot determine size of graphic in figures/Fig5f20349\_26\_endo\_6  
40 00.ps (no BoundingBox).

41  
42  
43 See the LaTeX manual or LaTeX Companion for explanation.

44 Type H <return> for immediate help.

45  
46 ...

47  
48  
49 l.152 ...=37mm]{figures/Fig5f20349\_26\_endo\_600.ps}

50  
51 \\

52 Try typing <return> to proceed.

53  
54 If that doesn't work, type X <return> to quit.

55  
56  
57  
58  
59  
60  
61  
62  
63  
64  
65

1  
2  
3 File: figures/Fig5f20349\_26\_endo\_600.ps Graphic file (type eps)

4 <figures/Fig5f20349\_26\_endo\_600.ps>  
5  
6

7  
8 LaTeX Warning: File `figures/Fig6a20347\_7\_Raw\_Image.ps' not found on input line  
9 176.  
10

11  
12  
13  
14 ! LaTeX Error: File `figures/Fig6a20347\_7\_Raw\_Image.ps' not found.  
15

16  
17 See the LaTeX manual or LaTeX Companion for explanation.

18 Type H <return> for immediate help.

19 ...  
20  
21

22  
23 l.176 ...=50mm]{figures/Fig6a20347\_7\_Raw\_Image.ps}  
24

25 &  
26

27 Try typing <return> to proceed.

28 If that doesn't work, type X <return> to quit.  
29  
30

31  
32  
33 ! LaTeX Error: Cannot determine size of graphic in figures/Fig6a20347\_7\_Raw\_Ima  
34 ge.ps (no BoundingBox).  
35  
36

37  
38 See the LaTeX manual or LaTeX Companion for explanation.

39 Type H <return> for immediate help.

40 ...  
41  
42

43  
44 l.176 ...=50mm]{figures/Fig6a20347\_7\_Raw\_Image.ps}  
45

46 &  
47

48 Try typing <return> to proceed.

49 If that doesn't work, type X <return> to quit.  
50  
51

52 File: figures/Fig6a20347\_7\_Raw\_Image.ps Graphic file (type eps)

53 <figures/Fig6a20347\_7\_Raw\_Image.ps>  
54  
55

56 LaTeX Warning: File `figures/Fig6billustration\_distances.ps' not found on input  
57  
58  
59  
60  
61  
62  
63  
64  
65

1  
2  
3  
4  
5  
6  
7  
8  
9  
10  
11  
12  
13  
14  
15  
16  
17  
18  
19  
20  
21  
22  
23  
24  
25  
26  
27  
28  
29  
30  
31  
32  
33  
34  
35  
36  
37  
38  
39  
40  
41  
42  
43  
44  
45  
46  
47  
48  
49  
50  
51  
52  
53  
54  
55  
56  
57  
58  
59  
60  
61  
62  
63  
64  
65

line 177.

! LaTeX Error: File `figures/Fig6billustration\_distances.ps' not found.

See the LaTeX manual or LaTeX Companion for explanation.

Type H <return> for immediate help.

...

l.177 ...]{figures/Fig6billustration\_distances.ps}

&

Try typing <return> to proceed.

If that doesn't work, type X <return> to quit.

! LaTeX Error: Cannot determine size of graphic in figures/Fig6billustration\_distances.ps (no BoundingBox).

See the LaTeX manual or LaTeX Companion for explanation.

Type H <return> for immediate help.

...

l.177 ...]{figures/Fig6billustration\_distances.ps}

&

Try typing <return> to proceed.

If that doesn't work, type X <return> to quit.

File: figures/Fig6billustration\_distances.ps Graphic file (type eps)

<figures/Fig6billustration\_distances.ps>

LaTeX Warning: File `figures/Fig6c20347\_7\_Regular\_Dilated\_Image.ps' not found on input line 178.

! LaTeX Error: File `figures/Fig6c20347\_7\_Regular\_Dilated\_Image.ps' not found.

1  
2  
3  
4  
5  
6  
7  
8  
9  
10  
11  
12  
13  
14  
15  
16  
17  
18  
19  
20  
21  
22  
23  
24  
25  
26  
27  
28  
29  
30  
31  
32  
33  
34  
35  
36  
37  
38  
39  
40  
41  
42  
43  
44  
45  
46  
47  
48  
49  
50  
51  
52  
53  
54  
55  
56  
57  
58  
59  
60  
61  
62  
63  
64  
65

See the LaTeX manual or LaTeX Companion for explanation.

Type H <return> for immediate help.

...

l.178 ...es/Fig6c20347\_7\_Regular\_Dilated\_Image.ps}

\\

Try typing <return> to proceed.

If that doesn't work, type X <return> to quit.

! LaTeX Error: Cannot determine size of graphic in figures/Fig6c20347\_7\_Regular  
\_Dilated\_Image.ps (no BoundingBox).

See the LaTeX manual or LaTeX Companion for explanation.

Type H <return> for immediate help.

...

l.178 ...es/Fig6c20347\_7\_Regular\_Dilated\_Image.ps}

\\

Try typing <return> to proceed.

If that doesn't work, type X <return> to quit.

File: figures/Fig6c20347\_7\_Regular\_Dilated\_Image.ps Graphic file (type eps)

<figures/Fig6c20347\_7\_Regular\_Dilated\_Image.ps>

LaTeX Warning: File `figures/Fig6d20347\_7\_Topo\_Dilated\_Image.ps' not found on i  
nput line 182.

! LaTeX Error: File `figures/Fig6d20347\_7\_Topo\_Dilated\_Image.ps' not found.

See the LaTeX manual or LaTeX Companion for explanation.

Type H <return> for immediate help.

...

1  
2  
3  
4  
5  
6  
7  
8  
9  
10  
11  
12  
13  
14  
15  
16  
17  
18  
19  
20  
21  
22  
23  
24  
25  
26  
27  
28  
29  
30  
31  
32  
33  
34  
35  
36  
37  
38  
39  
40  
41  
42  
43  
44  
45  
46  
47  
48  
49  
50  
51  
52  
53  
54  
55  
56  
57  
58  
59  
60  
61  
62  
63  
64  
65

l.182 ...gures/Fig6d20347\_7\_Topo\_Dilated\_Image.ps}

&

Try typing <return> to proceed.

If that doesn't work, type X <return> to quit.

! LaTeX Error: Cannot determine size of graphic in figures/Fig6d20347\_7\_Topo\_Dilated\_Image.ps (no BoundingBox).

See the LaTeX manual or LaTeX Companion for explanation.

Type H <return> for immediate help.

...

l.182 ...gures/Fig6d20347\_7\_Topo\_Dilated\_Image.ps}

&

Try typing <return> to proceed.

If that doesn't work, type X <return> to quit.

File: figures/Fig6d20347\_7\_Topo\_Dilated\_Image.ps Graphic file (type eps)

<figures/Fig6d20347\_7\_Topo\_Dilated\_Image.ps>

LaTeX Warning: File `figures/Fig6e20347\_7\_Topo\_Dilated\_Like\_Image.ps' not found on input line 183.

! LaTeX Error: File `figures/Fig6e20347\_7\_Topo\_Dilated\_Like\_Image.ps' not found

.

See the LaTeX manual or LaTeX Companion for explanation.

Type H <return> for immediate help.

...

l.183 .../Fig6e20347\_7\_Topo\_Dilated\_Like\_Image.ps}

\\



1  
2  
3 ! LaTeX Error: Cannot determine size of graphic in figures/Fig7BlueArrowCloseUp  
4 .ps (no BoundingBox).

5  
6  
7  
8 See the LaTeX manual or LaTeX Companion for explanation.

9 Type H <return> for immediate help.

10  
11 ...

12  
13  
14 l.205 ...ale=.95]{figures/Fig7BlueArrowCloseUp.ps}

15  
16 \\

17 Try typing <return> to proceed.

18 If that doesn't work, type X <return> to quit.

19  
20  
21  
22 File: figures/Fig7BlueArrowCloseUp.ps Graphic file (type eps)

23 <figures/Fig7BlueArrowCloseUp.ps>

24  
25  
26 LaTeX Warning: File `figures/Fig8aglobalView20349-3-28-greenROI.ps' not found o  
27 n input line 226.

28  
29  
30  
31  
32  
33 ! LaTeX Error: File `figures/Fig8aglobalView20349-3-28-greenROI.ps' not found.

34  
35  
36 See the LaTeX manual or LaTeX Companion for explanation.

37 Type H <return> for immediate help.

38  
39 ...

40  
41  
42 l.226 }

43  
44 &

45 Try typing <return> to proceed.

46 If that doesn't work, type X <return> to quit.

47  
48  
49  
50  
51  
52 ! LaTeX Error: Cannot determine size of graphic in figures/Fig8aglobalView20349  
53 -3-28-greenROI.ps (no BoundingBox).

54  
55  
56 See the LaTeX manual or LaTeX Companion for explanation.

57  
58  
59  
60  
61  
62  
63  
64  
65

1  
2  
3  
4  
5  
6  
7  
8  
9  
10  
11  
12  
13  
14  
15  
16  
17  
18  
19  
20  
21  
22  
23  
24  
25  
26  
27  
28  
29  
30  
31  
32  
33  
34  
35  
36  
37  
38  
39  
40  
41  
42  
43  
44  
45  
46  
47  
48  
49  
50  
51  
52  
53  
54  
55  
56  
57  
58  
59  
60  
61  
62  
63  
64  
65

Type H <return> for immediate help.

...

l.226 }

&

Try typing <return> to proceed.

If that doesn't work, type X <return> to quit.

File: figures/Fig8aglobalView20349-3-28-greenROI.ps Graphic file (type eps)

<figures/Fig8aglobalView20349-3-28-greenROI.ps>

Overfull vbox (202.81903pt too high) detected at line 226

□

LaTeX Warning: File `figures/Fig8bdarkG1.ps' not found on input line 227.

! LaTeX Error: File `figures/Fig8bdarkG1.ps' not found.

See the LaTeX manual or LaTeX Companion for explanation.

Type H <return> for immediate help.

...

l.227 ...hics[height=41mm]{figures/Fig8bdarkG1.ps}

&

Try typing <return> to proceed.

If that doesn't work, type X <return> to quit.

! LaTeX Error: Cannot determine size of graphic in figures/Fig8bdarkG1.ps (no BoundingBox).

See the LaTeX manual or LaTeX Companion for explanation.

Type H <return> for immediate help.

...

1  
2  
3  
4  
5  
6  
7  
8  
9  
10  
11  
12  
13  
14  
15  
16  
17  
18  
19  
20  
21  
22  
23  
24  
25  
26  
27  
28  
29  
30  
31  
32  
33  
34  
35  
36  
37  
38  
39  
40  
41  
42  
43  
44  
45  
46  
47  
48  
49  
50  
51  
52  
53  
54  
55  
56  
57  
58  
59  
60  
61  
62  
63  
64  
65

l.227 ...hics[height=41mm]{figures/Fig8bdarkG1.ps}

&

Try typing <return> to proceed.

If that doesn't work, type X <return> to quit.

File: figures/Fig8bdarkG1.ps Graphic file (type eps)

<figures/Fig8bdarkG1.ps>

LaTeX Warning: File `figures/Fig8bdarkG1\_VB.ps' not found on input line 228.

! LaTeX Error: File `figures/Fig8bdarkG1\_VB.ps' not found.

See the LaTeX manual or LaTeX Companion for explanation.

Type H <return> for immediate help.

...

l.228 ...s[height=41mm]{figures/Fig8bdarkG1\_VB.ps}

\\

Try typing <return> to proceed.

If that doesn't work, type X <return> to quit.

! LaTeX Error: Cannot determine size of graphic in figures/Fig8bdarkG1\_VB.ps (no BoundingBox).

See the LaTeX manual or LaTeX Companion for explanation.

Type H <return> for immediate help.

...

l.228 ...s[height=41mm]{figures/Fig8bdarkG1\_VB.ps}

\\

Try typing <return> to proceed.

If that doesn't work, type X <return> to quit.

1  
2  
3  
4  
5  
6  
7  
8  
9  
10  
11  
12  
13  
14  
15  
16  
17  
18  
19  
20  
21  
22  
23  
24  
25  
26  
27  
28  
29  
30  
31  
32  
33  
34  
35  
36  
37  
38  
39  
40  
41  
42  
43  
44  
45  
46  
47  
48  
49  
50  
51  
52  
53  
54  
55  
56  
57  
58  
59  
60  
61  
62  
63  
64  
65

File: figures/Fig8bdarkG1\_VB.ps Graphic file (type eps)

<figures/Fig8bdarkG1\_VB.ps>

LaTeX Warning: File `figures/Fig8cdarkG2.ps' not found on input line 231.

! LaTeX Error: File `figures/Fig8cdarkG2.ps' not found.

See the LaTeX manual or LaTeX Companion for explanation.

Type H <return> for immediate help.

...

l.231 ...hics[height=41mm]{figures/Fig8cdarkG2.ps}

&

Try typing <return> to proceed.

If that doesn't work, type X <return> to quit.

! LaTeX Error: Cannot determine size of graphic in figures/Fig8cdarkG2.ps (no BoundingBox).

See the LaTeX manual or LaTeX Companion for explanation.

Type H <return> for immediate help.

...

l.231 ...hics[height=41mm]{figures/Fig8cdarkG2.ps}

&

Try typing <return> to proceed.

If that doesn't work, type X <return> to quit.

File: figures/Fig8cdarkG2.ps Graphic file (type eps)

<figures/Fig8cdarkG2.ps>

LaTeX Warning: File `figures/Fig8cdarkG2\_VB.ps' not found on input line 232.

1  
2  
3  
4  
5  
6  
7  
8  
9  
10  
11  
12  
13  
14  
15  
16  
17  
18  
19  
20  
21  
22  
23  
24  
25  
26  
27  
28  
29  
30  
31  
32  
33  
34  
35  
36  
37  
38  
39  
40  
41  
42  
43  
44  
45  
46  
47  
48  
49  
50  
51  
52  
53  
54  
55  
56  
57  
58  
59  
60  
61  
62  
63  
64  
65

! LaTeX Error: File `figures/Fig8cdarkG2\_VB.ps' not found.

See the LaTeX manual or LaTeX Companion for explanation.

Type H <return> for immediate help.

...

l.232 ...s[height=41mm]{figures/Fig8cdarkG2\_VB.ps}

\\

Try typing <return> to proceed.

If that doesn't work, type X <return> to quit.

! LaTeX Error: Cannot determine size of graphic in figures/Fig8cdarkG2\_VB.ps (no BoundingBox).

See the LaTeX manual or LaTeX Companion for explanation.

Type H <return> for immediate help.

...

l.232 ...s[height=41mm]{figures/Fig8cdarkG2\_VB.ps}

\\

Try typing <return> to proceed.

If that doesn't work, type X <return> to quit.

File: figures/Fig8cdarkG2\_VB.ps Graphic file (type eps)

<figures/Fig8cdarkG2\_VB.ps>

Overfull \hbox (18.42337pt too wide) in paragraph at lines 222--235

□

□

LaTeX Warning: File `figures/Fig9adarkG4.ps' not found on input line 252.

1  
2  
3  
4  
5  
6  
7  
8  
9  
10  
11  
12  
13  
14  
15  
16  
17  
18  
19  
20  
21  
22  
23  
24  
25  
26  
27  
28  
29  
30  
31  
32  
33  
34  
35  
36  
37  
38  
39  
40  
41  
42  
43  
44  
45  
46  
47  
48  
49  
50  
51  
52  
53  
54  
55  
56  
57  
58  
59  
60  
61  
62  
63  
64  
65

! LaTeX Error: File `figures/Fig9adarkG4.ps' not found.

See the LaTeX manual or LaTeX Companion for explanation.

Type H <return> for immediate help.

...

l.252 ...hics[height=41mm]{figures/Fig9adarkG4.ps}

&

Try typing <return> to proceed.

If that doesn't work, type X <return> to quit.

! LaTeX Error: Cannot determine size of graphic in figures/Fig9adarkG4.ps (no BoundingBox).

See the LaTeX manual or LaTeX Companion for explanation.

Type H <return> for immediate help.

...

l.252 ...hics[height=41mm]{figures/Fig9adarkG4.ps}

&

Try typing <return> to proceed.

If that doesn't work, type X <return> to quit.

File: figures/Fig9adarkG4.ps Graphic file (type eps)

<figures/Fig9adarkG4.ps>

LaTeX Warning: File `figures/Fig9adarkG4\_VB.ps' not found on input line 253.

! LaTeX Error: File `figures/Fig9adarkG4\_VB.ps' not found.

See the LaTeX manual or LaTeX Companion for explanation.

Type H <return> for immediate help.

1  
2  
3  
4  
5  
6  
7  
8  
9  
10  
11  
12  
13  
14  
15  
16  
17  
18  
19  
20  
21  
22  
23  
24  
25  
26  
27  
28  
29  
30  
31  
32  
33  
34  
35  
36  
37  
38  
39  
40  
41  
42  
43  
44  
45  
46  
47  
48  
49  
50  
51  
52  
53  
54  
55  
56  
57  
58  
59  
60  
61  
62  
63  
64  
65

...

!253 ...s[height=41mm]{figures/Fig9adarkG4\_VB.ps}

&

Try typing <return> to proceed.

If that doesn't work, type X <return> to quit.

! LaTeX Error: Cannot determine size of graphic in figures/Fig9adarkG4\_VB.ps (no BoundingBox).

See the LaTeX manual or LaTeX Companion for explanation.

Type H <return> for immediate help.

...

!253 ...s[height=41mm]{figures/Fig9adarkG4\_VB.ps}

&

Try typing <return> to proceed.

If that doesn't work, type X <return> to quit.

File: figures/Fig9adarkG4\_VB.ps Graphic file (type eps)

<figures/Fig9adarkG4\_VB.ps>

LaTeX Warning: File `figures/Fig9bdarkG5.ps' not found on input line 255.

! LaTeX Error: File `figures/Fig9bdarkG5.ps' not found.

See the LaTeX manual or LaTeX Companion for explanation.

Type H <return> for immediate help.

...

!255 ...hics[height=41mm]{figures/Fig9bdarkG5.ps}

&

Try typing <return> to proceed.

1  
2  
3 If that doesn't work, type X <return> to quit.  
4  
5

6  
7  
8 ! LaTeX Error: Cannot determine size of graphic in figures/Fig9bdarkG5.ps (no B  
9 oundingBox).

10  
11  
12 See the LaTeX manual or LaTeX Companion for explanation.

13  
14 Type H <return> for immediate help.

15  
16 ...

17  
18  
19 l.255 ...hics[height=41mm]{figures/Fig9bdarkG5.ps}

20  
21 &

22 Try typing <return> to proceed.

23  
24 If that doesn't work, type X <return> to quit.

25  
26  
27 File: figures/Fig9bdarkG5.ps Graphic file (type eps)

28  
29 <figures/Fig9bdarkG5.ps>

30  
31 LaTeX Warning: File `figures/Fig9bdarkG5\_VB.ps' not found on input line 256.  
32  
33

34  
35  
36 ! LaTeX Error: File `figures/Fig9bdarkG5\_VB.ps' not found.  
37  
38

39 See the LaTeX manual or LaTeX Companion for explanation.

40  
41 Type H <return> for immediate help.

42  
43 ...

44  
45  
46 l.256 ...s[height=41mm]{figures/Fig9bdarkG5\_VB.ps}

47  
48 \\\

49 Try typing <return> to proceed.

50  
51 If that doesn't work, type X <return> to quit.  
52  
53

54  
55 ! LaTeX Error: Cannot determine size of graphic in figures/Fig9bdarkG5\_VB.ps (n  
56 o BoundingBox).  
57  
58  
59  
60  
61  
62  
63  
64  
65

1  
2  
3  
4  
5  
6  
7  
8  
9  
10  
11  
12  
13  
14  
15  
16  
17  
18  
19  
20  
21  
22  
23  
24  
25  
26  
27  
28  
29  
30  
31  
32  
33  
34  
35  
36  
37  
38  
39  
40  
41  
42  
43  
44  
45  
46  
47  
48  
49  
50  
51  
52  
53  
54  
55  
56  
57  
58  
59  
60  
61  
62  
63  
64  
65

See the LaTeX manual or LaTeX Companion for explanation.

Type H <return> for immediate help.

...

l.256 ...s[height=41mm]{figures/Fig9bdarkG5\_VB.ps}

\\

Try typing <return> to proceed.

If that doesn't work, type X <return> to quit.

File: figures/Fig9bdarkG5\_VB.ps Graphic file (type eps)

<figures/Fig9bdarkG5\_VB.ps>

LaTeX Warning: File `figures/Fig9cdarkG7.ps' not found on input line 259.

! LaTeX Error: File `figures/Fig9cdarkG7.ps' not found.

See the LaTeX manual or LaTeX Companion for explanation.

Type H <return> for immediate help.

...

l.259 ...hics[height=41mm]{figures/Fig9cdarkG7.ps}

&

Try typing <return> to proceed.

If that doesn't work, type X <return> to quit.

! LaTeX Error: Cannot determine size of graphic in figures/Fig9cdarkG7.ps (no BoundingBox).

See the LaTeX manual or LaTeX Companion for explanation.

Type H <return> for immediate help.

...

1  
2  
3 l.259 ...hics[height=41mm]{figures/Fig9cdarkG7.ps}

4  
5 &

6 Try typing <return> to proceed.

7  
8 If that doesn't work, type X <return> to quit.

9  
10  
11 File: figures/Fig9cdarkG7.ps Graphic file (type eps)  
12 <figures/Fig9cdarkG7.ps>

13  
14  
15  
16 LaTeX Warning: File `figures/Fig9cdarkG7\_VB.ps' not found on input line 260.

17  
18  
19  
20 ! LaTeX Error: File `figures/Fig9cdarkG7\_VB.ps' not found.

21  
22  
23 See the LaTeX manual or LaTeX Companion for explanation.

24  
25 Type H <return> for immediate help.

26  
27 ...

28  
29  
30 l.260 ...s[height=41mm]{figures/Fig9cdarkG7\_VB.ps}

31  
32 &

33 Try typing <return> to proceed.

34  
35 If that doesn't work, type X <return> to quit.

36  
37  
38  
39 ! LaTeX Error: Cannot determine size of graphic in figures/Fig9cdarkG7\_VB.ps (n  
40 o BoundingBox).

41  
42  
43 See the LaTeX manual or LaTeX Companion for explanation.

44  
45 Type H <return> for immediate help.

46  
47 ...

48  
49  
50 l.260 ...s[height=41mm]{figures/Fig9cdarkG7\_VB.ps}

51  
52 &

53 Try typing <return> to proceed.

54  
55 If that doesn't work, type X <return> to quit.

56  
57  
58  
59  
60  
61  
62  
63  
64  
65

1  
2  
3 File: figures/Fig9cdarkG7\_VB.ps Graphic file (type eps)  
4 <figures/Fig9cdarkG7\_VB.ps>  
5  
6

7  
8 LaTeX Warning: File `figures/Fig9ddarkG10.ps' not found on input line 262.  
9

10  
11  
12 ! LaTeX Error: File `figures/Fig9ddarkG10.ps' not found.  
13

14  
15 See the LaTeX manual or LaTeX Companion for explanation.  
16

17 Type H <return> for immediate help.  
18

19 ...  
20

21  
22 l.262 ...ics[height=41mm]{figures/Fig9ddarkG10.ps}

23 &  
24

25 Try typing <return> to proceed.  
26

27 If that doesn't work, type X <return> to quit.  
28  
29  
30

31 ! LaTeX Error: Cannot determine size of graphic in figures/Fig9ddarkG10.ps (no  
32 BoundingBox).  
33  
34  
35

36 See the LaTeX manual or LaTeX Companion for explanation.  
37

38 Type H <return> for immediate help.  
39

40 ...  
41

42 l.262 ...ics[height=41mm]{figures/Fig9ddarkG10.ps}

43 &  
44

45 Try typing <return> to proceed.  
46

47 If that doesn't work, type X <return> to quit.  
48  
49

50 File: figures/Fig9ddarkG10.ps Graphic file (type eps)  
51

52 <figures/Fig9ddarkG10.ps>  
53  
54

55 LaTeX Warning: File `figures/Fig9ddarkG10\_VB.ps' not found on input line 263.  
56  
57  
58  
59  
60  
61  
62  
63  
64  
65

1  
2  
3  
4  
5 ! LaTeX Error: File `figures/Fig9ddarkG10\_VB.ps' not found.  
6

7  
8 See the LaTeX manual or LaTeX Companion for explanation.

9 Type H <return> for immediate help.

10  
11 ...  
12

13  
14 l.263 ...[height=41mm]{figures/Fig9ddarkG10\_VB.ps}

15  
16 \\  
17

17 Try typing <return> to proceed.

18 If that doesn't work, type X <return> to quit.  
19  
20  
21  
22

23 ! LaTeX Error: Cannot determine size of graphic in figures/Fig9ddarkG10\_VB.ps (  
24 no BoundingBox).  
25  
26  
27

28 See the LaTeX manual or LaTeX Companion for explanation.

29 Type H <return> for immediate help.

30  
31 ...  
32  
33

34 l.263 ...[height=41mm]{figures/Fig9ddarkG10\_VB.ps}

35  
36 \\  
37

37 Try typing <return> to proceed.

38 If that doesn't work, type X <return> to quit.  
39  
40  
41

42 File: figures/Fig9ddarkG10\_VB.ps Graphic file (type eps)

43 <figures/Fig9ddarkG10\_VB.ps>

44 Overfull \hbox (8.89455pt too wide) in paragraph at lines 250--266

45  
46  
47 []  
48

49 []  
50  
51  
52

53 LaTeX Warning: File `figures/Fig10aG7Video.ps' not found on input line 277.  
54  
55  
56  
57  
58  
59  
60  
61  
62  
63  
64  
65

1  
2  
3 ! LaTeX Error: File `figures/Fig10aG7Video.ps' not found.  
4  
5

6 See the LaTeX manual or LaTeX Companion for explanation.

7 Type H <return> for immediate help.

8  
9 ...  
10

11  
12 l.277 ...m, height=55mm}{figures/Fig10aG7Video.ps}

13  
14 &

15 Try typing <return> to proceed.

16 If that doesn't work, type X <return> to quit.  
17  
18  
19  
20  
21

22 ! LaTeX Error: Cannot determine size of graphic in figures/Fig10aG7Video.ps (no  
23 BoundingBox).  
24

25  
26 See the LaTeX manual or LaTeX Companion for explanation.

27 Type H <return> for immediate help.

28  
29 ...  
30  
31

32  
33 l.277 ...m, height=55mm}{figures/Fig10aG7Video.ps}

34  
35 &

36 Try typing <return> to proceed.

37 If that doesn't work, type X <return> to quit.  
38  
39  
40

41 File: figures/Fig10aG7Video.ps Graphic file (type eps)

42 <figures/Fig10aG7Video.ps>  
43  
44

45 LaTeX Warning: File `figures/Fig10bg7VB.ps' not found on input line 278.  
46  
47  
48  
49

50 ! LaTeX Error: File `figures/Fig10bg7VB.ps' not found.  
51  
52

53 See the LaTeX manual or LaTeX Companion for explanation.

54 Type H <return> for immediate help.

55  
56 ...  
57  
58  
59  
60  
61  
62  
63  
64  
65

1  
2  
3  
4  
5  
6  
7  
8  
9  
10  
11  
12  
13  
14  
15  
16  
17  
18  
19  
20  
21  
22  
23  
24  
25  
26  
27  
28  
29  
30  
31  
32  
33  
34  
35  
36  
37  
38  
39  
40  
41  
42  
43  
44  
45  
46  
47  
48  
49  
50  
51  
52  
53  
54  
55  
56  
57  
58  
59  
60  
61  
62  
63  
64  
65

`l.278 ...52mm, height=55mm]{figures/Fig10bg7VB.ps}`

`&`

Try typing `<return>` to proceed.

If that doesn't work, type `X <return>` to quit.

! LaTeX Error: Cannot determine size of graphic in figures/Fig10bg7VB.ps (no BoundingBox).

See the LaTeX manual or LaTeX Companion for explanation.

Type `H <return>` for immediate help.

...

`l.278 ...52mm, height=55mm]{figures/Fig10bg7VB.ps}`

`&`

Try typing `<return>` to proceed.

If that doesn't work, type `X <return>` to quit.

File: figures/Fig10bg7VB.ps Graphic file (type eps)

`<figures/Fig10bg7VB.ps>`

LaTeX Warning: File `figures/Fig10cg7\_bad.ps' not found on input line 279.

! LaTeX Error: File `figures/Fig10cg7\_bad.ps' not found.

See the LaTeX manual or LaTeX Companion for explanation.

Type `H <return>` for immediate help.

...

`l.279 ...mm, height=55mm]{figures/Fig10cg7_bad.ps}`

`\\`

Try typing `<return>` to proceed.

If that doesn't work, type `X <return>` to quit.

1  
2  
3  
4  
5  
6  
7  
8  
9  
10  
11  
12  
13  
14  
15  
16  
17  
18  
19  
20  
21  
22  
23  
24  
25  
26  
27  
28  
29  
30  
31  
32  
33  
34  
35  
36  
37  
38  
39  
40  
41  
42  
43  
44  
45  
46  
47  
48  
49  
50  
51  
52  
53  
54  
55  
56  
57  
58  
59  
60  
61  
62  
63  
64  
65

! LaTeX Error: Cannot determine size of graphic in figures/Fig10cg7\_bad.ps (no BoundingBox).

See the LaTeX manual or LaTeX Companion for explanation.

Type H <return> for immediate help.

...

l.279 ...mm, height=55mm]{figures/Fig10cg7\_bad.ps}

\\

Try typing <return> to proceed.

If that doesn't work, type X <return> to quit.

File: figures/Fig10cg7\_bad.ps Graphic file (type eps)

<figures/Fig10cg7\_bad.ps>

LaTeX Warning: File `figures/Fig11a20349\_24\_gen8\_video\_only.ps' not found on input line 292.

! LaTeX Error: File `figures/Fig11a20349\_24\_gen8\_video\_only.ps' not found.

See the LaTeX manual or LaTeX Companion for explanation.

Type H <return> for immediate help.

...

l.292 ...igures/Fig11a20349\_24\_gen8\_video\_only.ps}

&

Try typing <return> to proceed.

If that doesn't work, type X <return> to quit.

! LaTeX Error: Cannot determine size of graphic in figures/Fig11a20349\_24\_gen8\_video\_only.ps (no BoundingBox).

1  
2  
3  
4 See the LaTeX manual or LaTeX Companion for explanation.

5 Type H <return> for immediate help.

6  
7 ...  
8  
9

10 l.292 ...igures/Fig11a20349\_24\_gen8\_video\_only.ps}

11  
12 &  
13

14 Try typing <return> to proceed.

15 If that doesn't work, type X <return> to quit.  
16  
17

18 File: figures/Fig11a20349\_24\_gen8\_video\_only.ps Graphic file (type eps)

19 <figures/Fig11a20349\_24\_gen8\_video\_only.ps>  
20  
21

22  
23 LaTeX Warning: File `figures/Fig11b20349\_24\_gen\_8\_good\_surfs.ps' not found on i  
24 nput line 293.  
25  
26

27  
28  
29 ! LaTeX Error: File `figures/Fig11b20349\_24\_gen\_8\_good\_surfs.ps' not found.  
30  
31

32  
33 See the LaTeX manual or LaTeX Companion for explanation.

34 Type H <return> for immediate help.

35  
36 ...  
37  
38

39 l.293 ...gures/Fig11b20349\_24\_gen\_8\_good\_surfs.ps}

40  
41 &  
42

43 Try typing <return> to proceed.

44 If that doesn't work, type X <return> to quit.  
45  
46

47  
48 ! LaTeX Error: Cannot determine size of graphic in figures/Fig11b20349\_24\_gen\_8  
49 \_good\_surfs.ps (no BoundingBox).  
50  
51

52  
53 See the LaTeX manual or LaTeX Companion for explanation.

54 Type H <return> for immediate help.

55  
56 ...  
57  
58  
59  
60  
61  
62  
63  
64  
65

1  
2  
3  
4  
5  
6  
7  
8  
9  
10  
11  
12  
13  
14  
15  
16  
17  
18  
19  
20  
21  
22  
23  
24  
25  
26  
27  
28  
29  
30  
31  
32  
33  
34  
35  
36  
37  
38  
39  
40  
41  
42  
43  
44  
45  
46  
47  
48  
49  
50  
51  
52  
53  
54  
55  
56  
57  
58  
59  
60  
61  
62  
63  
64  
65

l.293 ...gures/Fig11b20349\_24\_gen\_8\_good\_surfs.ps}

&

Try typing <return> to proceed.

If that doesn't work, type X <return> to quit.

File: figures/Fig11b20349\_24\_gen\_8\_good\_surfs.ps Graphic file (type eps)

<figures/Fig11b20349\_24\_gen\_8\_good\_surfs.ps>

LaTeX Warning: File `figures/Fig11c20349\_24\_gen8\_bad\_surfs\_only.ps' not found on input line 294.

! LaTeX Error: File `figures/Fig11c20349\_24\_gen8\_bad\_surfs\_only.ps' not found.

See the LaTeX manual or LaTeX Companion for explanation.

Type H <return> for immediate help.

...

l.294 ...es/Fig11c20349\_24\_gen8\_bad\_surfs\_only.ps}

\\

Try typing <return> to proceed.

If that doesn't work, type X <return> to quit.

! LaTeX Error: Cannot determine size of graphic in figures/Fig11c20349\_24\_gen8\_bad\_surfs\_only.ps (no BoundingBox).

See the LaTeX manual or LaTeX Companion for explanation.

Type H <return> for immediate help.

...

l.294 ...es/Fig11c20349\_24\_gen8\_bad\_surfs\_only.ps}

\\

Try typing <return> to proceed.

1  
2  
3 If that doesn't work, type X <return> to quit.  
4  
5

6 File: figures/Fig11c20349\_24\_gen8\_bad\_surfs\_only.ps Graphic file (type eps)  
7 <figures/Fig11c20349\_24\_gen8\_bad\_surfs\_only.ps>  
8  
9

10 LaTeX Warning: File `figures/Fig1220349\_3\_28\_screenshot\_snagit\_resized\_cropped.  
11 ps' not found on input line 308.  
12  
13

14  
15  
16  
17 ! LaTeX Error: File `figures/Fig1220349\_3\_28\_screenshot\_snagit\_resized\_cropped.  
18 ps' not found.  
19  
20

21  
22 See the LaTeX manual or LaTeX Companion for explanation.  
23 Type H <return> for immediate help.  
24

25 ...  
26

27  
28 l.308 ...\_28\_screenshot\_snagit\_resized\_cropped.ps}  
29

30 \\

31 Try typing <return> to proceed.  
32

33 If that doesn't work, type X <return> to quit.  
34  
35

36  
37  
38 ! LaTeX Error: Cannot determine size of graphic in figures/Fig1220349\_3\_28\_scre  
39 enshot\_snagit\_resized\_cropped.ps (no BoundingBox).  
40  
41

42 See the LaTeX manual or LaTeX Companion for explanation.  
43 Type H <return> for immediate help.  
44

45 ...  
46

47  
48 l.308 ...\_28\_screenshot\_snagit\_resized\_cropped.ps}  
49

50 \\

51 Try typing <return> to proceed.  
52

53 If that doesn't work, type X <return> to quit.  
54  
55

56 File: figures/Fig1220349\_3\_28\_screenshot\_snagit\_resized\_cropped.ps Graphic file  
57  
58  
59  
60  
61  
62  
63  
64  
65

1  
2  
3  
4  
5  
6  
7  
8  
9  
10  
11  
12  
13  
14  
15  
16  
17  
18  
19  
20  
21  
22  
23  
24  
25  
26  
27  
28  
29  
30  
31  
32  
33  
34  
35  
36  
37  
38  
39  
40  
41  
42  
43  
44  
45  
46  
47  
48  
49  
50  
51  
52  
53  
54  
55  
56  
57  
58  
59  
60  
61  
62  
63  
64  
65

(type eps)

<figures/Fig1220349\_3\_28\_screenshot\_snagit\_resized\_cropped.ps> [23] [24] [25]  
[26] [27] [28] [29] (.p6summary.tex) [30]

] (./cbm2008gibbs\_submitted.aux) )

Here is how much of TeX's memory you used:

1727 strings out of 94074

21927 string characters out of 1165320

89899 words of memory out of 1500000

4945 multiletter control sequences out of 10000+50000

13277 words of font info for 48 fonts, out of 1200000 for 2000

645 hyphenation exceptions out of 8191

27i,13n,24p,1562b,470s stack positions out of 5000i,500n,6000p,200000b,5000s

Output written on cbm2008gibbs\_submitted.dvi (30 pages, 100964 bytes).
